# Supplementary material
Source: Springer Nature journal article supplement (https://www.springermedizin.de/resource/supplementary/12884_2010_388_MOESM2_ESM.pdf/9457596)
Supplement: MOESM2 [file 9457596]

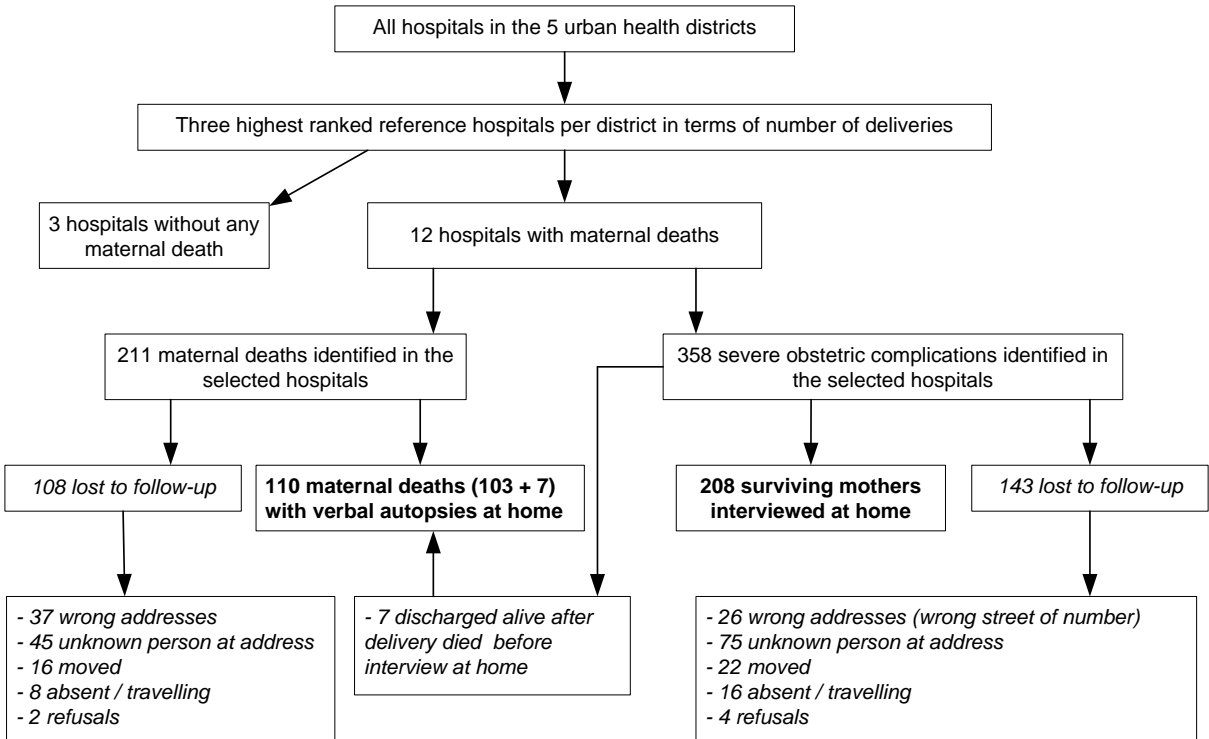

All hospitals in the 5 urban health districts

Three highest ranked reference hospitals per district in terms of number of deliveries

3 hospitals without any maternal death

12 hospitals with maternal deaths

211 maternal deaths identified in the selected hospitals

358 severe obstetric complications identified in the selected hospitals

108 lost to follow-up

**110 maternal deaths (103 + 7) with verbal autopsies at home**

**208 surviving mothers interviewed at home**

143 lost to follow-up

- 37 wrong addresses
- 45 unknown person at address
- 16 moved
- 8 absent / travelling
- 2 refusals

- 7 discharged alive after delivery died before interview at home

- 26 wrong addresses (wrong street of number)
- 75 unknown person at address
- 22 moved
- 16 absent / travelling
- 4 refusals
